# Supplementary material
Source: PubMed Central journal article supplement (PMC5677563)
Supplement: NIHMS914764-supplement-1.pdf [file NIHMS914764-supplement-1.pdf]

## SUPPORTING INFORMATION

# Distinguishing Nitro vs Nitrito Coordination in Cytochrome *c'* using Vibrational Spectroscopy and Density Functional Theory

Zach N. Nilsson,<sup>†</sup> Brian L. Mandella,<sup>†</sup> Kakali Sen,<sup>‡,⊥</sup> Demet Kekilli,<sup>‡</sup> Michael A. Hough,<sup>‡</sup> Pierre Moënne-Loccoz,<sup>§</sup> Richard W. Strange,<sup>‡</sup> and Colin R. Andrew<sup>†</sup>

<sup>†</sup>Department of Chemistry and Biochemistry, Eastern Oregon University, La Grande, OR 97850

<sup>‡</sup>School of Biological Sciences, University of Essex, Colchester Essex, CO4 3SQ, UK

<sup>⊥</sup>Scientific Computing Department, STFC Daresbury Laboratory, Warrington, Cheshire, WA4 4AD, UK

<sup>§</sup>Division of Environmental and Biomolecular Systems, Oregon Health and Science University, Portland, OR 97239

## Supplementary Data

**Figure S1.** Porphyrin marker RR bands of Fe(III) L16G AXCP (pH 7.0, room temperature) in the absence and presence of nitrite.

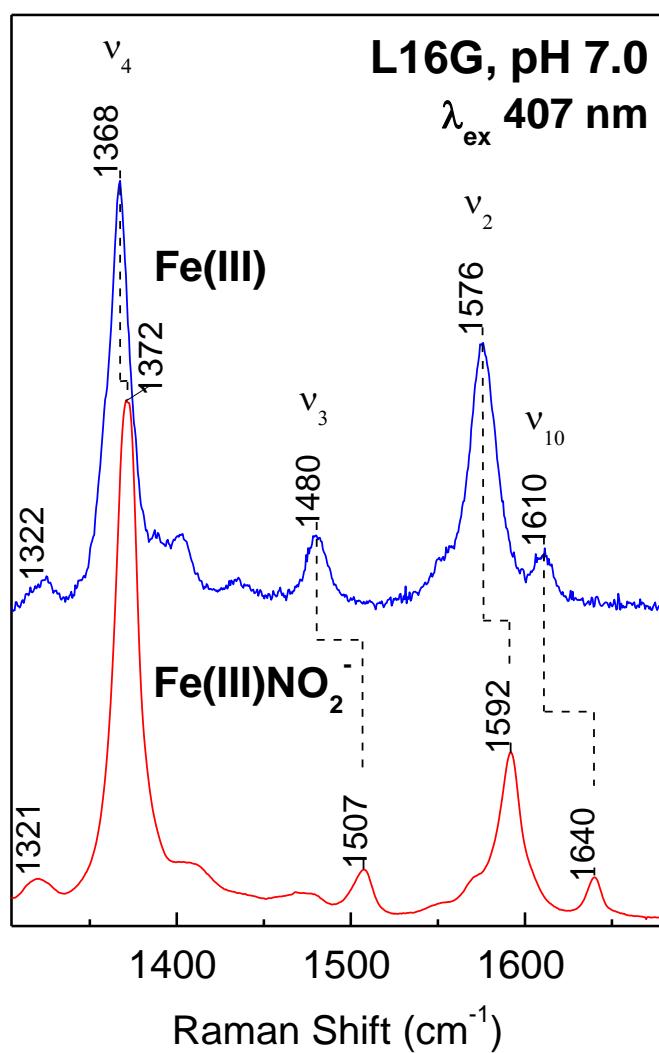

**Figure S2.** RR spectra of Fe(III)-nitrite L16G AXCP obtained at 110 K. Left panel shows the porphyrin marker band region. Right panel shows the low-frequency region and the identification of the  $\delta(\text{NO}_2)$  vibration via isotopic substitution (inset).

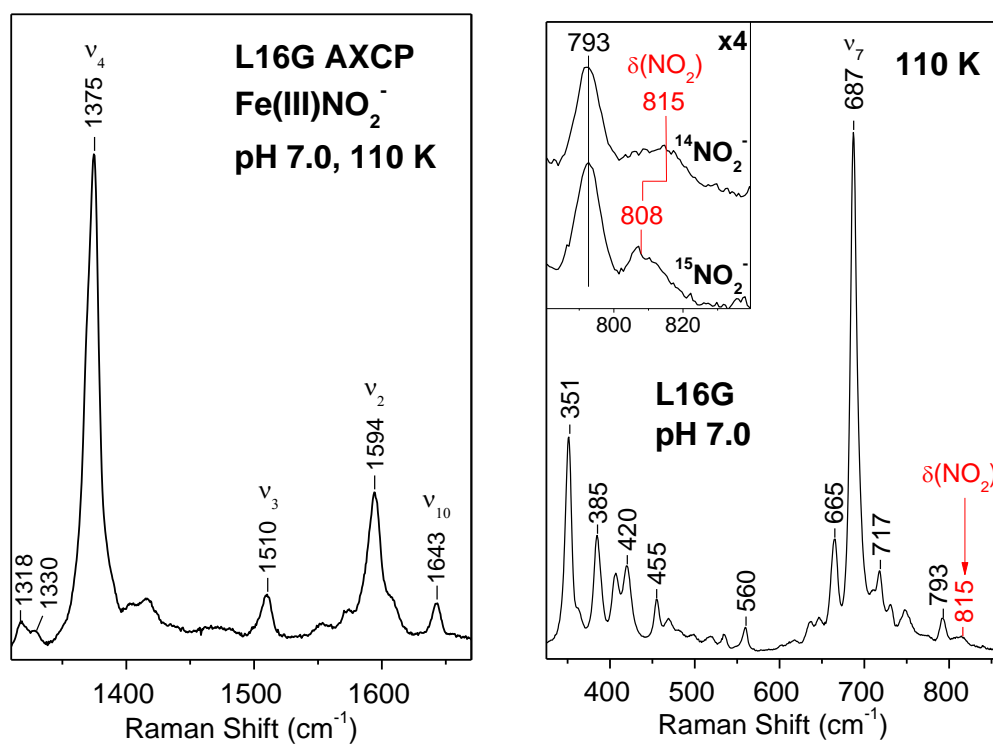

**Figure S3.** EPR spectrum of the nitrite complex of Fe(III) L16G AXCP (100  $\mu$ M in heme, 20 mM nitrite) obtained at 10 K. Dominant low-spin rhombic  $g$  values are observed at 2.84, 2.36 and 1.56. Lower intensity signals at  $g = 3.25$  and 2.2 are suggestive of minor conformational heterogeneity in the low-spin nitrite complex, while the signal around  $g = 2.07$  is likely to reflect some Cu(II) impurity.

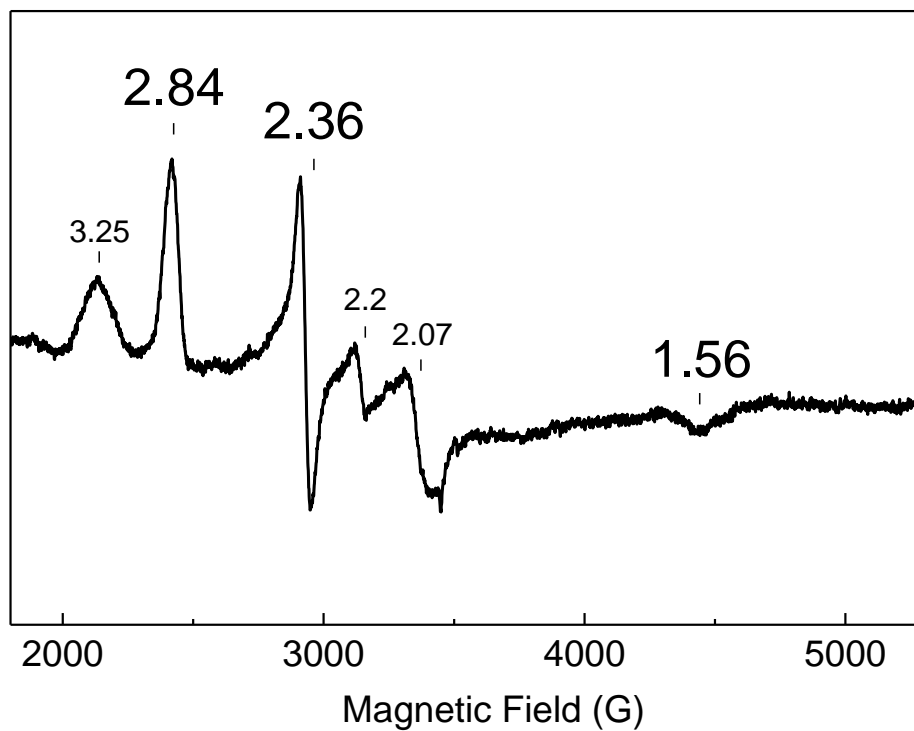

**Figure S4.** Titration of Fe(III) L16G AXCP (pH 7.0) with nitrite to determine  $K_d$ .

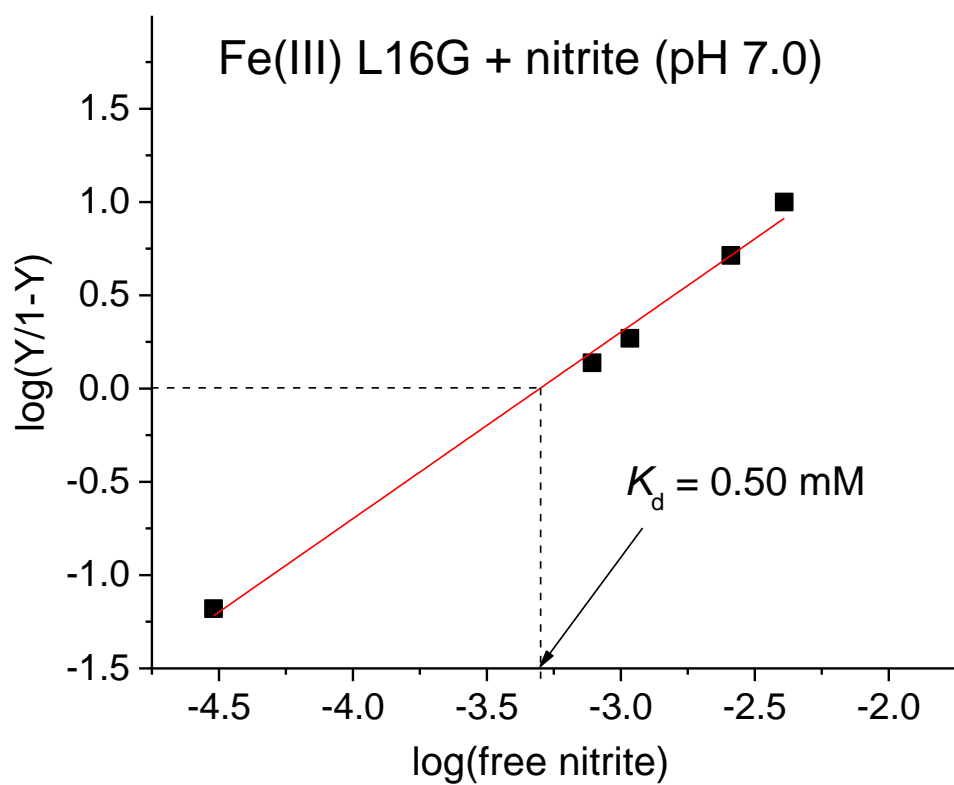

**Figure S5.** Absorption time courses at 415 nm showing the reaction of Fe(III) L16G AXCP with nitrite. Overlaid (and mostly obscured) are kinetic fits to single exponential functions

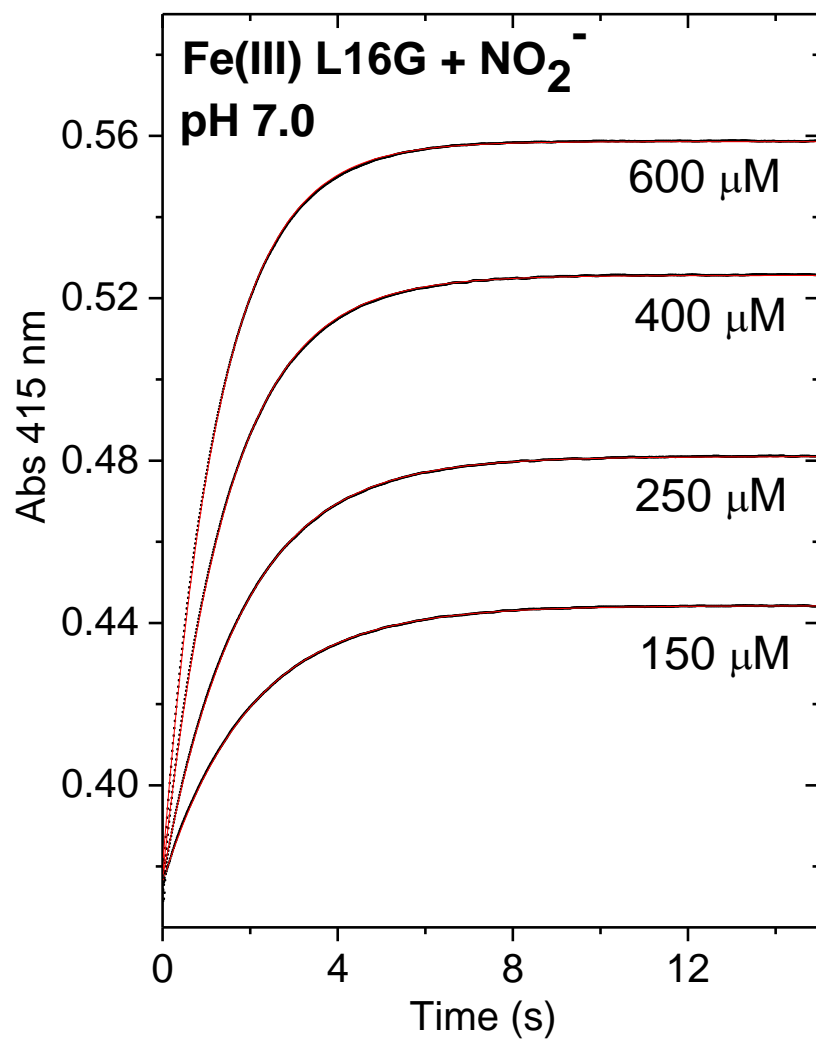

**Figure S6.** Determination of  $k_{\text{on}}$  and  $k_{\text{off}}$  for the Fe(III)-nitrite complex of L16G AXCP from the dependence of  $k_{\text{obs}}$  on nitrite concentration.

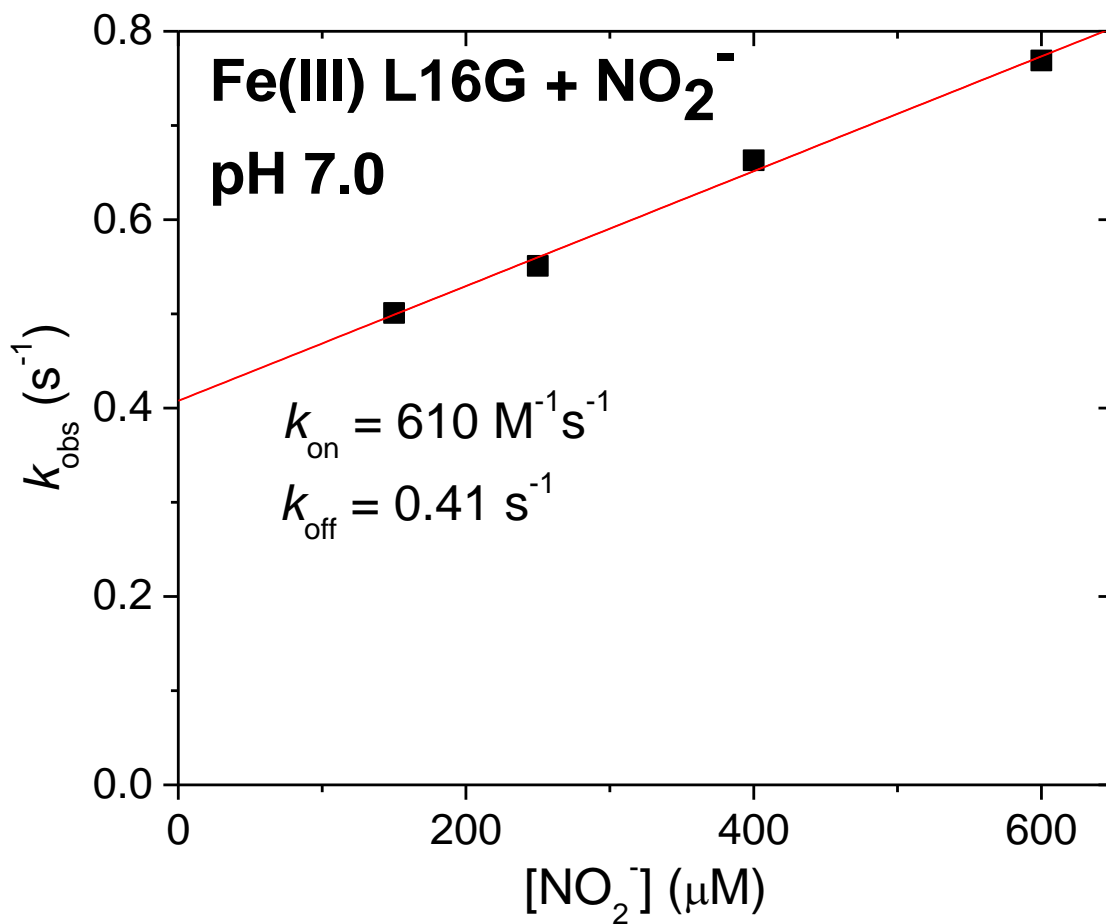

**Figure S7.** Room-temperature RR spectra of Fe(III)-nitrite L16G AXCP prepared with  $^{14}\text{NO}_2^-$  and  $^{15}\text{NO}_2^-$ , recorded in different frequency windows: (A) 370 – 850- $\text{cm}^{-1}$ , (B) 1240 – 1660  $\text{cm}^{-1}$ , and (C) 760 – 1350  $\text{cm}^{-1}$ .

(A)

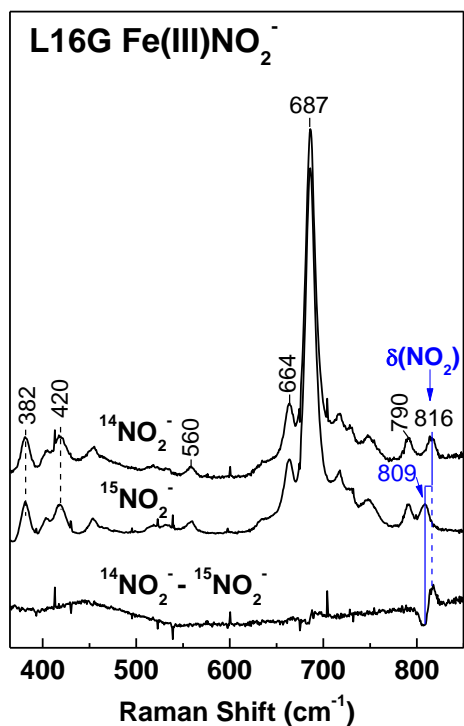

(B)

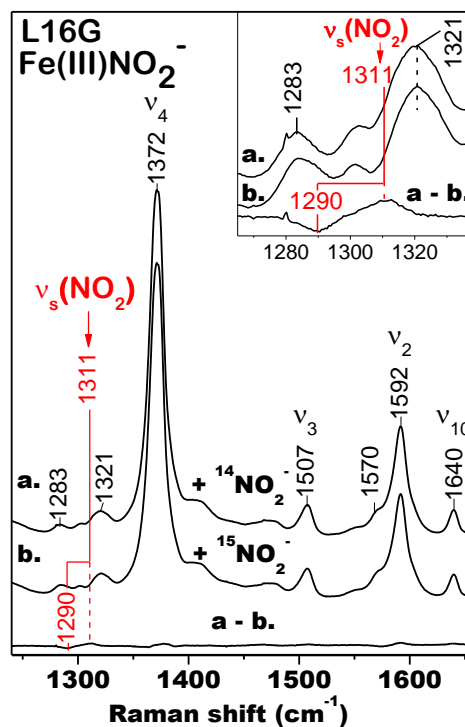

(C)

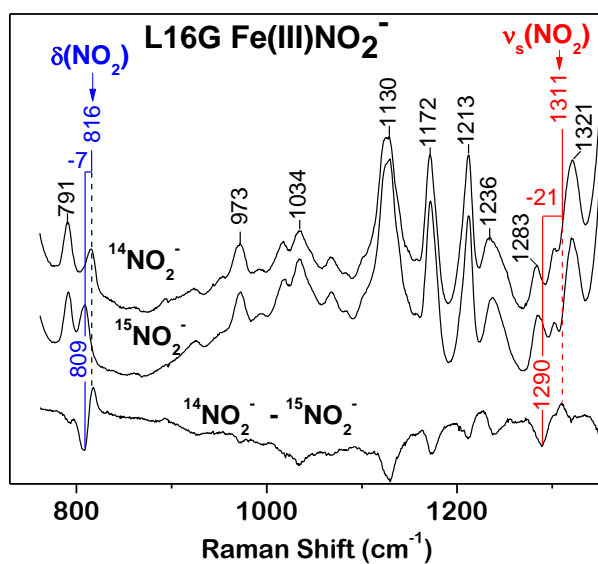



**Figure S8.** Top panel: UV-vis spectra of L16G AXCP  $\{\text{FeNO}\}^6$  (magenta, solid line) and  $\{\text{FeNO}\}^7$  (blue, dashed line) complexes (pH 7.0), formed by the reaction of NO with Fe(III) and Fe(II) L16G AXCP, respectively. Bottom panel: UV-vis spectra showing the photoconversion of the L16G AXCP  $\text{Fe(III)NO}_2^-$  complex (red line) to the  $\{\text{FeNO}\}^7$  complex (blue line) upon 200 s illumination with a Xe arc lamp. The spectrum recorded after 50 s illumination (green line) is consistent with a mixture of species that includes the  $\{\text{FeNO}\}^6$  complex.

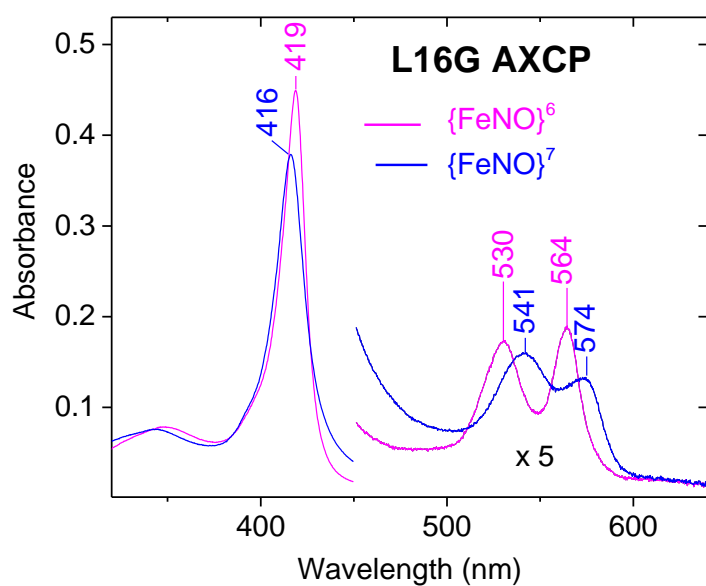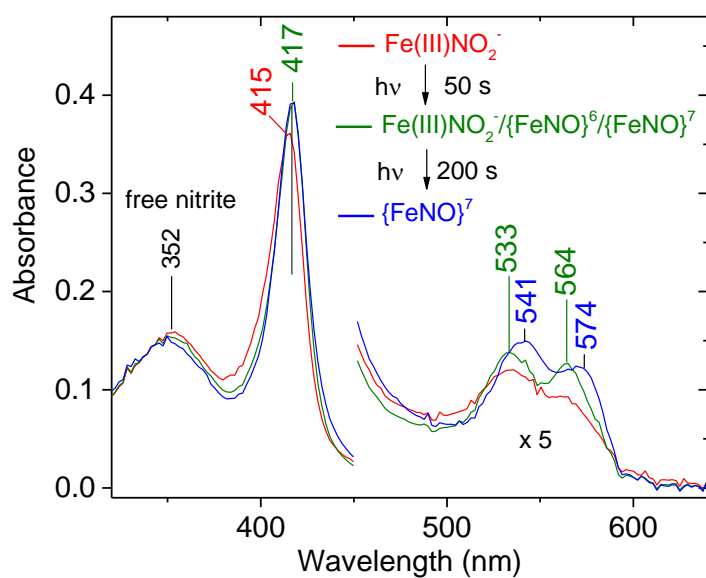

**Figure S9.** RR spectra of  $\{\text{FeNO}\}^7$  L16G AXCP in the high frequency (left panel) and low frequency (right panel) regions. Samples were measured at room temperature (rt) with  $^{14}\text{N}^{16}\text{O}$  (A) and  $^{15}\text{N}^{18}\text{O}$  (B) as well as at 100 K with  $^{14}\text{N}^{16}\text{O}$  (C) and  $^{15}\text{N}^{18}\text{O}$  (D). Vibrational assignments are based on isotopic substitution difference spectra at room temperature (A-B) and 100 K (C-D).

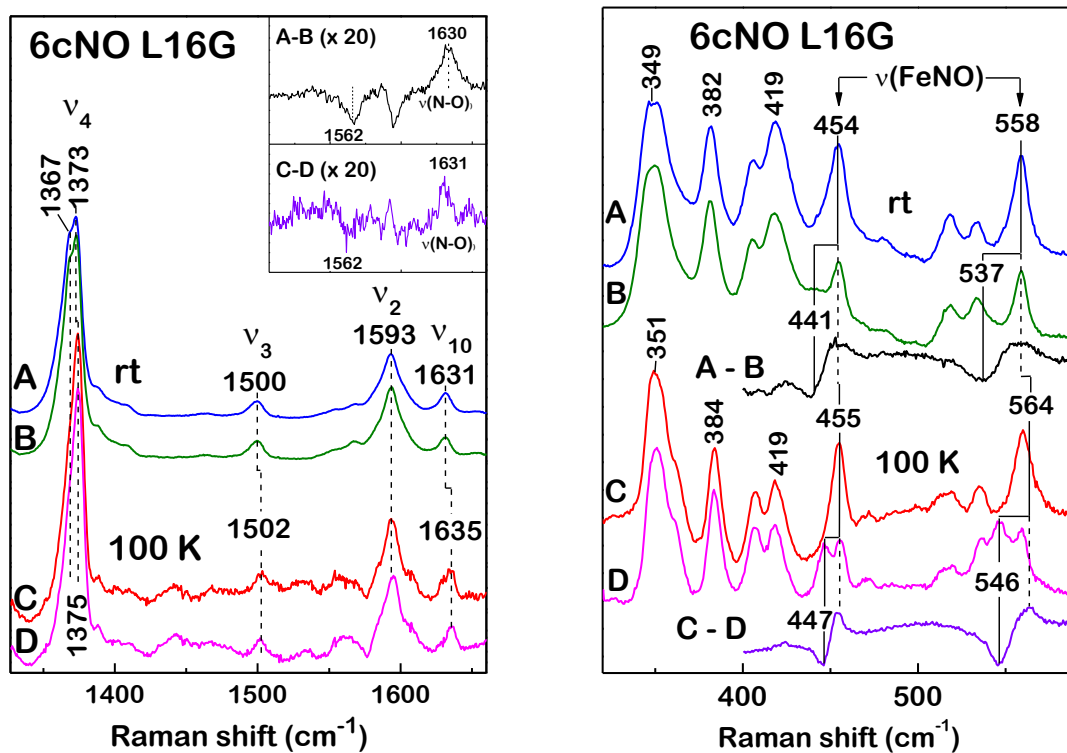

**Figure S10.** L16G AXCP N-bound and O-bound  $\text{NO}_2^-$  structures with different propionate configurations, relaxed from the crystal structure and flipped to the proximal side of the heme. Absolute energies are in hartrees (1 hartree = 2625.5  $\text{kJ mol}^{-1}$ ), bond lengths in Å.

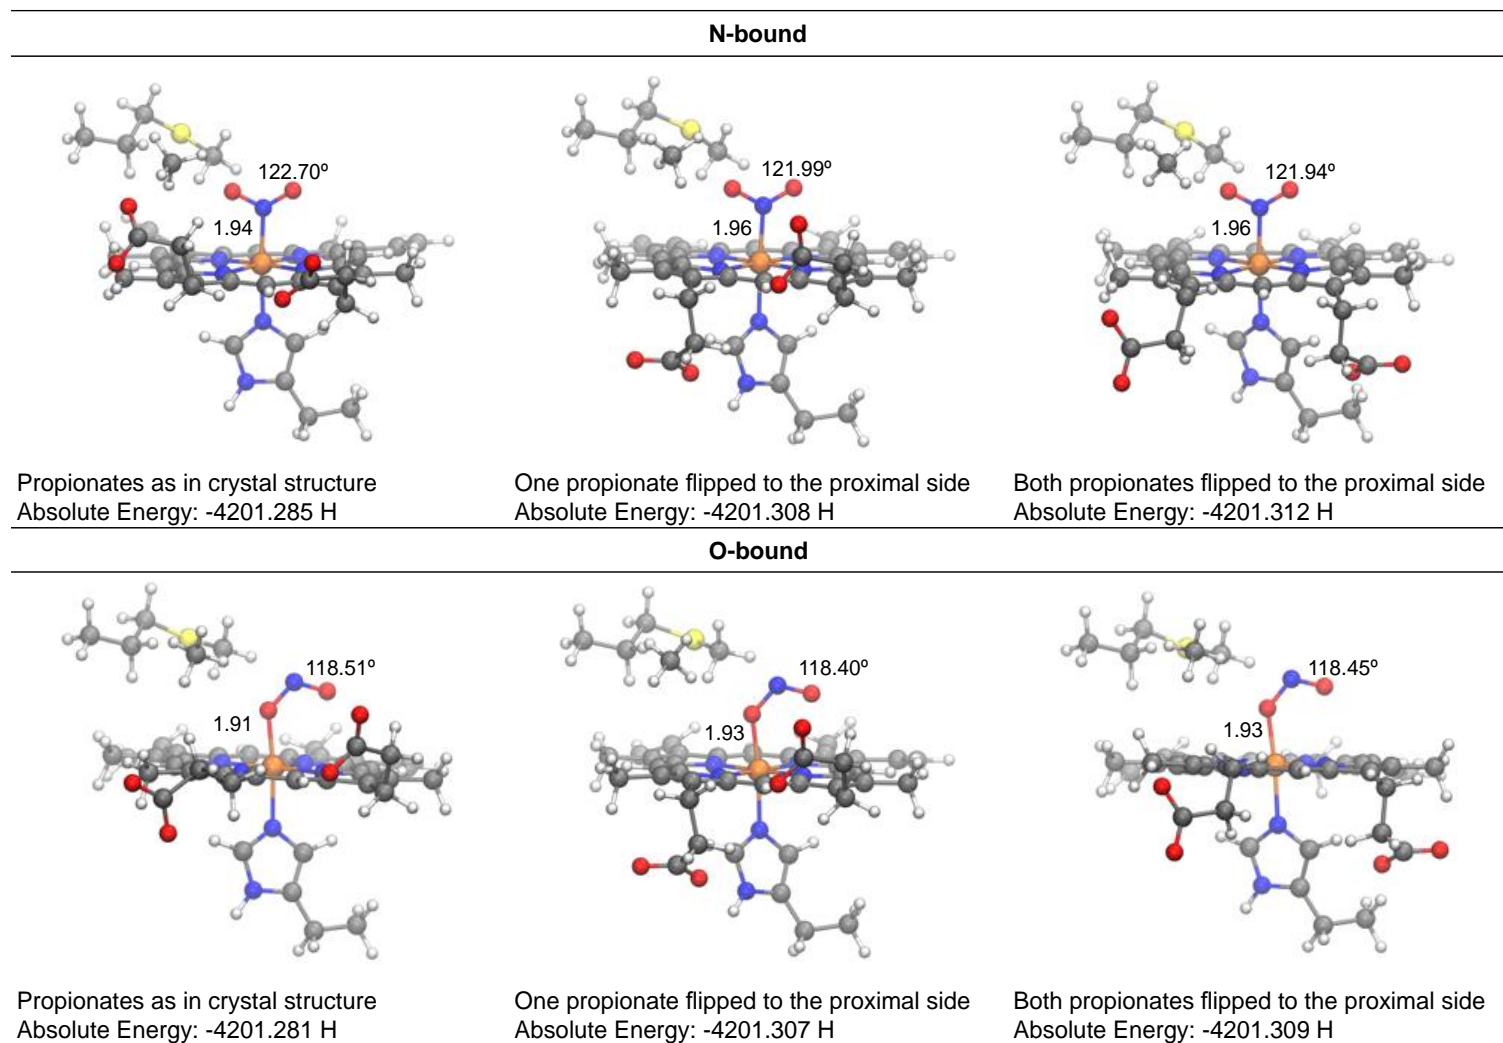

**Figure S11.** Calculated normal-mode eigenvectors for vibrational modes of the L16G AXCP Fe(III)-nitrite complex.

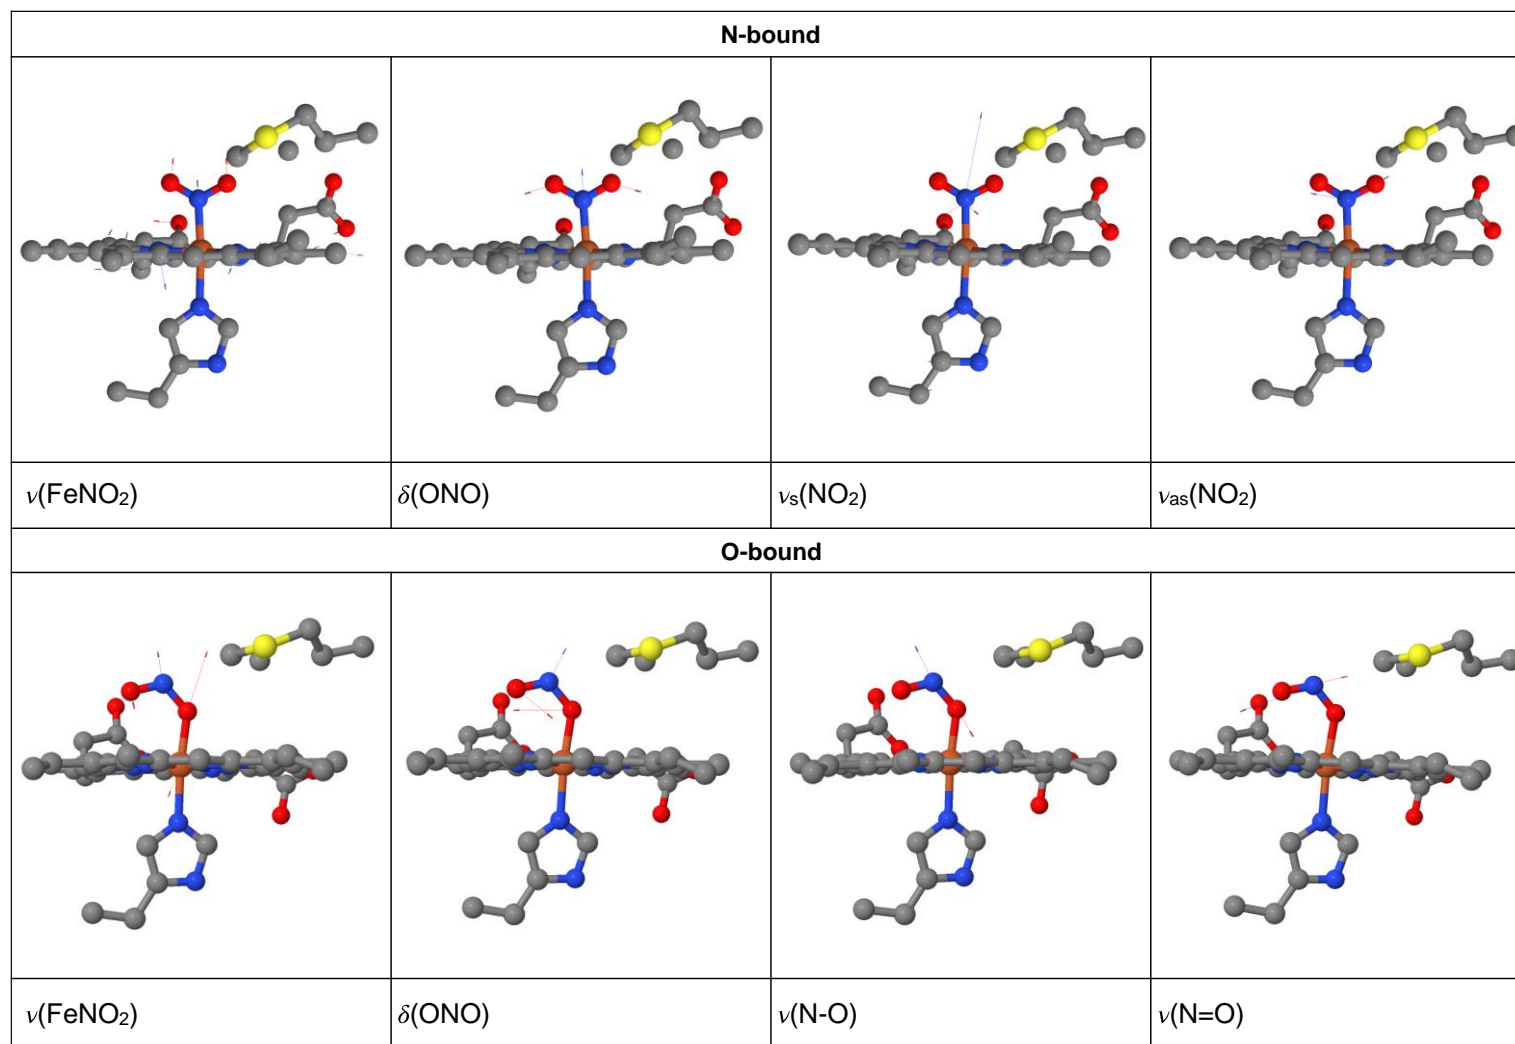

**Table S1.** Crystallographic data collection, processing and refinement statistics for Fe(III)-nitrite L16G AXCP. Values in parentheses are for highest resolution shells. Data were processed using  $CC-1/2 \geq 0.5$  and  $I/\sigma(I) \geq 1.0$  (outer shell) cut off.

|                                            |                            |
|--------------------------------------------|----------------------------|
| <b>Structure</b>                           | L16G-NO <sub>2</sub> AXCP  |
| Space Group                                | P6 <sub>5</sub> 22         |
| Cell axis (Å)                              | 53.91, 53.91, 183.21       |
| Resolution (Å)                             | 45.24 – 1.06 (1.08 – 1.06) |
| Unique reflections                         | 70168 (3511)               |
| Redundancy                                 | 7.7 (5.1)                  |
| R <sub>pim</sub> (%)                       | 2.3 (49.3)                 |
| CC-1/2 outer shell                         | 0.59                       |
| I/σ(I)                                     | 13.1 (1.2)                 |
| Completeness (%)                           | 96.8 (99.0)                |
| Wilson B-factor (Å <sup>2</sup> )          | 8.5                        |
| <b>Refinement</b>                          |                            |
| R <sub>work</sub> /R <sub>free</sub> (%)   | 17.8 / 20.0                |
| RMSD Bond Length (Å)                       | 0.016                      |
| RMSD Bond Angle (°)                        | 2.18                       |
| ML Based ESU (Å)                           | 0.024                      |
| Average Protein B-factor (Å <sup>2</sup> ) | 13.3                       |
| Average Water B-factor (Å <sup>2</sup> )   | 28.7                       |
| <b>Ramachandran (%)</b>                    |                            |
| Favored Regions                            | 96                         |
| Allowed Regions                            | 4                          |
| PDB Code                                   | 5NGX                       |

**Table S2.** Effect of distal coordination and redox state on the electronic properties of L16G AXCP, pH 7.0.

|                                        | spin<br>state |     | $\lambda_{\max}$ (nm) |     | ref       |
|----------------------------------------|---------------|-----|-----------------------|-----|-----------|
| Fe(III)(OH <sub>2</sub> )              | 6cHS          | 405 | 500                   | 627 | this work |
| Fe(III)(NO <sub>2</sub> <sup>-</sup> ) | 6cLS          | 415 | 535                   | 571 | this work |
| {FeNO} <sup>6</sup>                    | 6cLS          | 419 | 530                   | 564 | this work |
| {FeNO} <sup>7</sup>                    | 6cLS          | 416 | 541                   | 574 | this work |

**Table S3.** Porphyrin marker vibrational frequencies ( $\text{cm}^{-1}$ ) of aqua and nitrite complexes of Fe(III) heme proteins.

|                                        | temp  | spin-<br>state | $\nu_4$ | $\nu_3$ | $\nu_2$ | $\nu_{10}$ | ref       |
|----------------------------------------|-------|----------------|---------|---------|---------|------------|-----------|
| L16G AXCP, pH 7.0                      |       |                |         |         |         |            |           |
| Fe(III)(OH <sub>2</sub> )              | rt    | 6cHS           | 1368    | 1480    | 1576    | 1610       | this work |
| Fe(III)(NO <sub>2</sub> <sup>-</sup> ) | rt    | 6cLS           | 1372    | 1507    | 1592    | 1640       | this work |
|                                        | 110 K | 6cLS           | 1375    | 1510    | 1594    | 1643       | this work |
| NP4, pH 7.0                            |       |                |         |         |         |            |           |
| Fe(III)(OH <sub>2</sub> )              | 298 K | 6cHS           | 1372    | 1481    | 1560    | 1610       | 1         |
| Fe(III)(NO <sub>2</sub> <sup>-</sup> ) | 77 K  | 6cLS           | 1375    | 1507    | 1584    | 1638       | 2         |
| Hb, pH 6.6                             |       |                |         |         |         |            |           |
| Fe(III)(OH <sub>2</sub> )              | 298 K | 6cHS           | 1373    | 1481    | 1561    | 1610       | 3         |
| Fe(III)(NO <sub>2</sub> <sup>-</sup> ) | 77 K  | 6cLS           | 1375    | 1507    | 1585    | 1640       | 2         |

**Table S4.** Kinetic parameters and dissociation constants for heme protein Fe(III)nitrite complexes

| protein          |               | $k_{\text{on}}$ ( $\text{M}^{-1}\text{s}^{-1}$ ) | $k_{\text{off}}$ ( $\text{s}^{-1}$ ) | $K_{\text{D}}$ ( $\text{mM}$ ) <sup>a</sup> | ref       |
|------------------|---------------|--------------------------------------------------|--------------------------------------|---------------------------------------------|-----------|
| L16G AXCP        | pH 7.0, 25 °C | 610                                              | 0.41                                 | 0.67, 0.50                                  | this work |
| Mb <sup>b</sup>  | pH 7.4, 20 °C | 156                                              | 2.6                                  | 16.7                                        | 4         |
| Hb <sup>c</sup>  | pH 7.4, 25 °C |                                                  |                                      | 3.0                                         | 5         |
| Hb <sup>c</sup>  | pH 7.4, 25 °C |                                                  |                                      | 1.1                                         | 6         |
| Hb <sup>c</sup>  | pH 6.9, 20 °C | 140 <sup>e</sup>                                 |                                      |                                             | 7         |
|                  |               | 20 <sup>f</sup>                                  |                                      |                                             |           |
| NP4 <sup>d</sup> | pH 7.0, 30 °C | 0.13 <sup>e</sup>                                | 0.0084 <sup>e</sup>                  | 67 <sup>e</sup>                             | 2         |
|                  |               | 0.01 <sup>f</sup>                                | 0.00047 <sup>f</sup>                 | 47 <sup>f</sup>                             |           |
| NP7 <sup>d</sup> | pH 7.0, 30 °C | 0.076 <sup>e</sup>                               | 0.00040 <sup>e</sup>                 | 5.2 <sup>e</sup>                            | 2         |
|                  |               | 0.0088 <sup>f</sup>                              | 0.00013 <sup>f</sup>                 | 15 <sup>f</sup>                             |           |

<sup>a</sup>Dissociation constants,  $K_{\text{d}}$ , calculated from the ratio of  $k_{\text{off}}/k_{\text{on}}$ , except for values in italics determined by titration. <sup>b</sup>Horse Mb. <sup>c</sup>Human Hb. <sup>d</sup>nitrophorin from *Rhodnius prolixus*. <sup>e</sup>Slow component of biphasic reaction. <sup>f</sup>Fast component of biphasic reaction.



## References

1. Zareba, A. A. Resonance Raman spectroscopic characterization of nitrophorins from *Rhodnius prolixus* and *Cimex lectularius*. University of Houston, 2006.
2. He, C.; Ogata, H.; Knipp, M., Formation of the complex of nitrite with the ferriheme b beta-barrel proteins nitrophorin 4 and nitrophorin 7. *Biochemistry* **2010**, *49*, 5841-5851.
3. Spiro, T. G.; Stong, J. D.; Stein, P., Porphyrin core expansion and doming in heme proteins. New evidence from resonance Raman spectra of six-coordinate high-spin iron(III) hemes. *J. Am. Chem. Soc.* **1979**, *101*, 2648-2655.
4. Wanat, A.; Gdul-Argasinska, J.; Rutkowska-Zbik, D.; Witko, M.; Stochel, G.; van Eldik, R., Nitrite binding to metmyoglobin and methemoglobin in comparison to nitric oxide binding. *J. Biol. Inorg. Chem.* **2002**, *7*, 165-176.
5. Smith, R. P., The nitrite methemoglobin complex: Its significance in methemoglobin analyses and its possible role in methemoglobinemia. *Biochem. Pharmacol.* **1967**, *16*, 1655-1664.
6. Rodkey, K. L., A mechanism for the conversion of oxyhemoglobin to methemoglobin by nitrite. *Clin. Chem.* **1976**, *22*, 1986-1990.
7. Gibson, Q. H.; Parkhurst, L. J.; Geraci, G., The reaction of methemoglobin with some ligands. *J. Biol. Chem.* **1969**, *244*, 4668-4676.

## Cartesian coordinates of the optimized nitro and nitrito complexes

### Nitro complex

|   |           |          |          |
|---|-----------|----------|----------|
| C | -24.73858 | 21.14488 | 12.13954 |
| H | -24.86072 | 20.86432 | 11.08457 |
| H | -25.68462 | 21.50676 | 12.57904 |
| H | -24.37897 | 20.27187 | 12.71147 |
| H | -23.98557 | 21.94429 | 12.18731 |
| C | -20.94984 | 20.41766 | 14.94521 |
| H | -21.31938 | 19.39577 | 15.14034 |
| H | -21.67519 | 21.11528 | 15.39254 |
| H | -19.98949 | 20.53862 | 15.47738 |
| C | -20.78658 | 20.68503 | 13.44767 |
| H | -21.76586 | 20.65900 | 12.94500 |
| H | -20.40026 | 21.70767 | 13.30992 |
| C | -19.81903 | 19.70956 | 12.76384 |
| H | -19.04469 | 19.36820 | 13.47261 |
| H | -20.35537 | 18.80867 | 12.41724 |
| S | -18.84700 | 20.41808 | 11.38320 |
| C | -20.16030 | 21.12760 | 10.33856 |
| H | -19.65823 | 21.63035 | 9.49995  |
| H | -20.74737 | 21.88015 | 10.87637 |
| H | -20.84428 | 20.36141 | 9.94527  |
| C | -22.33207 | 29.80868 | 5.66733  |
| H | -21.45090 | 29.19899 | 5.41290  |
| H | -22.27080 | 30.75242 | 5.10405  |
| H | -23.22148 | 29.25902 | 5.32250  |
| C | -22.40079 | 30.07600 | 7.17012  |
| H | -23.29877 | 30.68347 | 7.39271  |
| H | -21.53956 | 30.70427 | 7.47034  |
| C | -22.43347 | 28.83650 | 7.99210  |
| N | -22.52051 | 28.84834 | 9.37693  |
| H | -22.51360 | 29.66992 | 9.96748  |
| C | -22.67233 | 27.56717 | 9.80912  |
| H | -22.78026 | 27.26792 | 10.84943 |
| N | -22.67995 | 26.75428 | 8.77497  |
| C | -22.53501 | 27.51338 | 7.63804  |
| H | -22.53527 | 27.06097 | 6.65138  |
| C | -26.30041 | 25.31193 | 8.92823  |
| H | -27.38969 | 25.47903 | 8.91641  |
| C | -25.69800 | 25.21279 | 7.68266  |
| C | -26.41178 | 25.35467 | 6.42090  |
| C | -25.51045 | 25.01529 | 5.44085  |
| C | -24.23670 | 24.76850 | 6.10343  |
| N | -24.37397 | 24.91580 | 7.45891  |
| C | -23.04269 | 24.52975 | 5.44144  |
| H | -23.09447 | 24.42267 | 4.35936  |
| C | -21.78197 | 24.47840 | 6.03433  |
| C | -20.52877 | 24.42217 | 5.29310  |
| C | -19.51559 | 24.49704 | 6.24301  |
| C | -20.16471 | 24.56294 | 7.52834  |
| N | -21.53398 | 24.56730 | 7.37473  |
| C | -19.49484 | 24.57895 | 8.75047  |

|   |           |          |          |
|---|-----------|----------|----------|
| H | -18.40705 | 24.52533 | 8.72527  |
| C | -20.09838 | 24.60750 | 9.99992  |
| C | -19.37894 | 24.53647 | 11.26501 |
| C | -20.34193 | 24.59039 | 12.26011 |
| C | -21.61944 | 24.69089 | 11.58744 |
| N | -21.44696 | 24.68244 | 10.22646 |
| C | -22.83872 | 24.83155 | 12.24782 |
| H | -22.82725 | 24.82116 | 13.33688 |
| C | -24.07700 | 24.98601 | 11.64415 |
| C | -25.32104 | 25.14182 | 12.38969 |
| C | -26.32879 | 25.25207 | 11.45721 |
| C | -25.67098 | 25.19740 | 10.15770 |
| N | -24.30501 | 25.02147 | 10.29224 |
| C | -27.81368 | 25.23173 | 11.66410 |
| H | -28.10115 | 25.90809 | 12.48572 |
| H | -28.33655 | 25.54628 | 10.74874 |
| C | -28.29048 | 23.82225 | 12.08834 |
| H | -29.37868 | 23.76857 | 11.90896 |
| H | -27.81209 | 23.04896 | 11.46802 |
| C | -28.02058 | 23.54772 | 13.60032 |
| O | -27.38056 | 22.50712 | 13.88573 |
| O | -28.44406 | 24.43238 | 14.38843 |
| C | -25.41568 | 25.09583 | 13.87950 |
| H | -24.62960 | 25.70674 | 14.35867 |
| H | -26.40842 | 25.41457 | 14.22735 |
| H | -25.32580 | 24.05455 | 14.22994 |
| C | -20.14200 | 24.60746 | 13.74142 |
| H | -20.95902 | 25.13517 | 14.25478 |
| H | -20.10349 | 23.58882 | 14.16508 |
| H | -19.19231 | 25.10044 | 14.00322 |
| C | -17.93331 | 24.43207 | 11.39249 |
| H | -17.35143 | 24.84449 | 10.55826 |
| C | -17.25438 | 23.87342 | 12.41133 |
| H | -16.16067 | 23.85049 | 12.41064 |
| H | -17.75996 | 23.37408 | 13.23911 |
| C | -18.03958 | 24.53694 | 6.00769  |
| H | -17.65626 | 23.58023 | 5.60896  |
| H | -17.77770 | 25.31451 | 5.26966  |
| H | -17.48491 | 24.76068 | 6.93024  |
| C | -20.44863 | 24.34289 | 3.84637  |
| H | -21.41686 | 24.33864 | 3.33460  |
| C | -19.35859 | 24.27142 | 3.05424  |
| H | -19.47329 | 24.21725 | 1.96778  |
| H | -18.33959 | 24.25348 | 3.44175  |
| C | -25.78559 | 24.95459 | 3.96996  |
| H | -24.90018 | 24.66201 | 3.38588  |
| H | -26.58208 | 24.22352 | 3.75271  |
| H | -26.14305 | 25.92523 | 3.58099  |
| C | -27.80521 | 25.87260 | 6.23066  |
| H | -28.01858 | 26.61784 | 7.01319  |
| H | -27.82668 | 26.39054 | 5.25513  |
| C | -28.96438 | 24.85398 | 6.30295  |
| H | -29.66957 | 25.01680 | 5.47038  |
| H | -28.59644 | 23.81872 | 6.19474  |
| C | -29.81777 | 24.92714 | 7.63220  |
| O | -30.88219 | 24.29277 | 7.59739  |
| O | -29.32371 | 25.61716 | 8.56495  |

|    |           |          |         |
|----|-----------|----------|---------|
| Fe | -22.93155 | 24.73504 | 8.84076 |
| N  | -23.11649 | 22.80123 | 8.78567 |
| O  | -22.95114 | 22.23535 | 9.86279 |
| O  | -23.33339 | 22.19523 | 7.74877 |

### Nitrito Complex

|   |           |          |          |
|---|-----------|----------|----------|
| C | -24.52278 | 20.94459 | 11.90327 |
| H | -25.33246 | 20.20042 | 11.89779 |
| H | -23.65914 | 20.53692 | 12.45078 |
| H | -24.22411 | 21.19805 | 10.87610 |
| H | -24.87511 | 21.85881 | 12.40193 |
| C | -20.69658 | 20.27169 | 14.66448 |
| H | -21.02967 | 19.22809 | 14.80290 |
| H | -21.44490 | 20.92226 | 15.14384 |
| H | -19.74364 | 20.39988 | 15.20701 |
| C | -20.54473 | 20.62624 | 13.17957 |
| H | -21.52404 | 20.55428 | 12.68168 |
| H | -20.23350 | 21.67757 | 13.08403 |
| C | -19.53406 | 19.76418 | 12.42738 |
| H | -18.58326 | 19.71067 | 12.98543 |
| H | -19.90918 | 18.72985 | 12.32056 |
| S | -19.03374 | 20.40427 | 10.78213 |
| C | -20.64067 | 20.74767 | 9.99098  |
| H | -20.41934 | 21.01274 | 8.94798  |
| H | -21.16235 | 21.60047 | 10.44415 |
| H | -21.29472 | 19.86331 | 9.99603  |
| C | -22.57443 | 30.03035 | 5.87065  |
| H | -21.63087 | 29.54084 | 5.58253  |
| H | -22.63695 | 30.99966 | 5.35277  |
| H | -23.39886 | 29.39713 | 5.50880  |
| C | -22.65941 | 30.21801 | 7.38785  |
| H | -23.59299 | 30.75459 | 7.64035  |
| H | -21.83521 | 30.87193 | 7.73070  |
| C | -22.62614 | 28.91845 | 8.13788  |
| N | -22.71955 | 28.84342 | 9.52291  |
| H | -22.80246 | 29.62701 | 10.15853 |
| C | -22.77357 | 27.53603 | 9.88686  |
| H | -22.87868 | 27.17986 | 10.90950 |
| N | -22.70706 | 26.77327 | 8.81383  |
| C | -22.61377 | 27.60758 | 7.71789  |
| H | -22.56520 | 27.20850 | 6.70958  |
| C | -26.30039 | 25.16908 | 8.88515  |
| H | -27.39654 | 25.25539 | 8.87915  |
| C | -25.68895 | 25.16559 | 7.63543  |
| C | -26.38813 | 25.32979 | 6.36719  |
| C | -25.43425 | 25.18530 | 5.38707  |
| C | -24.16242 | 24.97586 | 6.05845  |
| N | -24.34572 | 24.95082 | 7.41850  |
| C | -22.93825 | 24.87788 | 5.41157  |
| H | -22.94943 | 24.93367 | 4.32394  |

|   |           |          |          |
|---|-----------|----------|----------|
| C | -21.70324 | 24.70620 | 6.03374  |
| C | -20.43025 | 24.59146 | 5.33401  |
| C | -19.46638 | 24.39791 | 6.31665  |
| C | -20.16049 | 24.42922 | 7.58154  |
| N | -21.50913 | 24.62000 | 7.38442  |
| C | -19.52809 | 24.30565 | 8.81789  |
| H | -18.44956 | 24.15184 | 8.81416  |
| C | -20.14697 | 24.37387 | 10.05761 |
| C | -19.45017 | 24.25063 | 11.33277 |
| C | -20.41823 | 24.37169 | 12.31544 |
| C | -21.67536 | 24.55806 | 11.62518 |
| N | -21.48446 | 24.57971 | 10.26727 |
| C | -22.90343 | 24.66099 | 12.27106 |
| H | -22.90271 | 24.60303 | 13.35765 |
| C | -24.13282 | 24.79280 | 11.64655 |
| C | -25.40367 | 24.84944 | 12.35690 |
| C | -26.38151 | 24.98731 | 11.39346 |
| C | -25.66743 | 25.02762 | 10.11104 |
| N | -24.31068 | 24.91631 | 10.28887 |
| C | -27.85230 | 25.25601 | 11.52437 |
| H | -27.96717 | 26.35811 | 11.52331 |
| H | -28.38132 | 24.88463 | 10.63162 |
| C | -28.54313 | 24.79056 | 12.80783 |
| H | -29.63066 | 24.78317 | 12.61152 |
| H | -28.28362 | 23.75092 | 13.07203 |
| C | -28.32729 | 25.70895 | 14.06141 |
| O | -28.53277 | 25.16419 | 15.16915 |
| O | -27.95446 | 26.88680 | 13.82390 |
| C | -25.52133 | 24.88227 | 13.84832 |
| H | -24.59946 | 24.53911 | 14.34286 |
| H | -25.76301 | 25.90675 | 14.17739 |
| H | -26.35409 | 24.27804 | 14.22718 |
| C | -20.26117 | 24.27303 | 13.79940 |
| H | -21.14615 | 23.81741 | 14.26881 |
| H | -19.38352 | 23.66306 | 14.06175 |
| H | -20.12146 | 25.26253 | 14.27186 |
| C | -18.02567 | 23.99473 | 11.48590 |
| H | -17.56031 | 23.42013 | 10.67685 |
| C | -17.25295 | 24.36706 | 12.52385 |
| H | -16.19701 | 24.08395 | 12.56893 |
| H | -17.64268 | 24.96526 | 13.35098 |
| C | -17.99954 | 24.16651 | 6.13761  |
| H | -17.81030 | 23.44007 | 5.33029  |
| H | -17.45911 | 25.09174 | 5.86407  |
| H | -17.53413 | 23.77343 | 7.05299  |
| C | -20.28174 | 24.66140 | 3.89166  |
| H | -21.22128 | 24.62412 | 3.32915  |
| C | -19.14914 | 24.76688 | 3.16577  |
| H | -19.19241 | 24.80062 | 2.07337  |
| H | -18.15920 | 24.83257 | 3.61910  |
| C | -25.67135 | 25.21339 | 3.90784  |
| H | -24.77088 | 24.94247 | 3.33613  |
| H | -26.46416 | 24.49995 | 3.62930  |
| H | -26.00758 | 26.20719 | 3.55937  |
| C | -27.84589 | 25.60028 | 6.16271  |
| H | -28.22813 | 26.25310 | 6.96358  |
| H | -27.95098 | 26.13641 | 5.20287  |

|    |           |          |         |
|----|-----------|----------|---------|
| C  | -28.76029 | 24.35643 | 6.17958 |
| H  | -29.56441 | 24.47702 | 5.43146 |
| H  | -28.21573 | 23.44097 | 5.89424 |
| C  | -29.48618 | 24.08154 | 7.55702 |
| O  | -30.14412 | 23.03119 | 7.58730 |
| O  | -29.33556 | 24.96359 | 8.44537 |
| Fe | -22.92533 | 24.73678 | 8.83161 |
| O  | -23.11625 | 22.84199 | 9.03055 |
| N  | -23.17815 | 21.90176 | 8.12958 |
| O  | -23.13930 | 22.21555 | 6.96756 |

### Vibrational Frequencies (cm<sup>-1</sup>)

#### Nitro Complex

0: 0.00  
1: 0.00  
2: 0.00  
3: 0.00  
4: 0.00  
5: 0.00  
6: -99.66  
7: -36.62  
8: -28.61  
9: -20.57  
10: -13.70  
11: 3.64  
12: 5.75  
13: 13.36  
14: 16.97  
15: 20.69  
16: 22.02  
17: 28.78  
18: 30.70  
19: 31.41  
20: 37.35  
21: 40.39  
22: 42.08  
23: 50.20  
24: 54.33  
25: 55.26  
26: 61.67

27: 65.30  
28: 70.60  
29: 72.50  
30: 81.32  
31: 83.68  
32: 89.84  
33: 94.13  
34: 97.00  
35: 100.20  
36: 105.08  
37: 106.86  
38: 112.92  
39: 116.79  
40: 122.02  
41: 129.42  
42: 132.13  
43: 135.74  
44: 141.79  
45: 144.26  
46: 155.34  
47: 157.63  
48: 163.65  
49: 173.22  
50: 183.21  
51: 188.15  
52: 192.22  
53: 194.94  
54: 197.59  
55: 205.57  
56: 209.93  
57: 214.13  
58: 215.41  
59: 220.18  
60: 222.12  
61: 226.83  
62: 233.50  
63: 239.52  
64: 239.74  
65: 246.99  
66: 252.64  
67: 259.20  
68: 266.47  
69: 272.28  
70: 281.78  
71: 283.64  
72: 291.02  
73: 296.00  
74: 308.88  
75: 310.06  
76: 310.81  
77: 318.09  
78: 324.46  
79: 330.88  
80: 336.79

81: 340.05  
82: 343.94  
83: 347.77  
84: 358.81  
85: 376.30  
86: 379.23  
87: 390.25  
88: 399.48  
89: 414.09  
90: 427.20  
91: 430.37  
92: 435.92  
93: 458.76  
94: 469.05  
95: 493.45  
96: 506.17  
97: 514.59  
98: 521.63  
99: 523.39  
100: 544.60  
101: 561.09  
102: 571.07  
103: 587.02  
104: 607.20  
105: 609.54  
106: 613.96  
107: 632.23  
108: 641.70  
109: 641.78  
110: 651.67  
111: 659.99  
112: 674.49  
113: 678.94  
114: 679.79  
115: 685.59  
116: 693.32  
117: 714.54  
118: 718.31  
119: 718.79  
120: 725.13  
121: 730.32  
122: 732.64  
123: 739.32  
124: 741.29  
125: 744.39  
126: 748.17  
127: 765.91  
128: 768.06  
129: 770.54  
130: 778.33  
131: 782.85  
132: 783.72  
133: 795.44  
134: 802.98



135: 812.76  
136: 815.83  
137: 835.64  
138: 839.93  
139: 844.65  
140: 846.74  
141: 848.79  
142: 850.63  
143: 857.92  
144: 862.62  
145: 872.93  
146: 874.95  
147: 887.26  
148: 905.84  
149: 923.47  
150: 942.20  
151: 944.96  
152: 952.91  
153: 957.97  
154: 966.22  
155: 971.28  
156: 972.95  
157: 977.06  
158: 984.31  
159: 995.05  
160: 1009.07  
161: 1010.73  
162: 1017.84  
163: 1018.77  
164: 1021.62  
165: 1024.97  
166: 1028.76  
167: 1035.38  
168: 1035.78  
169: 1038.05  
170: 1039.80  
171: 1045.03  
172: 1052.45  
173: 1057.94  
174: 1058.16  
175: 1077.76  
176: 1084.00  
177: 1085.09  
178: 1101.60  
179: 1105.15  
180: 1106.01  
181: 1118.58  
182: 1128.73  
183: 1134.77  
184: 1149.58  
185: 1153.74  
186: 1156.93  
187: 1160.54  
188: 1164.39

189: 1167.57  
190: 1170.86  
191: 1184.28  
192: 1200.68  
193: 1215.98  
194: 1218.25  
195: 1228.89  
196: 1232.28  
197: 1233.93  
198: 1244.97  
199: 1253.60  
200: 1266.25  
201: 1274.01  
202: 1274.83  
203: 1291.03  
204: 1291.40  
205: 1293.91  
206: 1299.57  
207: 1308.59  
208: 1312.89  
209: 1315.72  
210: 1323.18  
211: 1331.00  
212: 1331.22  
213: 1339.79  
214: 1344.03  
215: 1352.67  
216: 1361.63  
217: 1365.13  
218: 1369.08  
219: 1370.85  
220: 1378.46  
221: 1379.04  
222: 1388.51  
223: 1392.70  
224: 1398.22  
225: 1398.57  
226: 1399.40  
227: 1401.90  
228: 1411.00  
229: 1413.43  
230: 1417.51  
231: 1420.49  
232: 1425.78  
233: 1427.62  
234: 1429.38  
235: 1430.17  
236: 1434.45  
237: 1437.48  
238: 1443.52  
239: 1446.09  
240: 1446.52  
241: 1449.99  
242: 1451.38

243: 1452.19  
244: 1454.88  
245: 1455.76  
246: 1461.88  
247: 1463.70  
248: 1464.70  
249: 1465.96  
250: 1466.03  
251: 1466.18  
252: 1466.70  
253: 1467.27  
254: 1472.16  
255: 1472.60  
256: 1473.47  
257: 1481.65  
258: 1485.93  
259: 1496.22  
260: 1517.91  
261: 1527.47  
262: 1532.33  
263: 1537.95  
264: 1545.97  
265: 1548.72  
266: 1564.66  
267: 1575.82  
268: 1588.47  
269: 1599.09  
270: 1615.40  
271: 1624.75  
272: 1628.04  
273: 1646.50  
274: 1654.25  
275: 1657.63  
276: 1679.50  
277: 1686.67  
278: 1713.11  
279: 1716.56  
280: 1764.06  
281: 2981.88  
282: 2988.73  
283: 2997.93  
284: 3001.37  
285: 3005.13  
286: 3007.84  
287: 3009.14  
288: 3017.62  
289: 3017.83  
290: 3019.24  
291: 3019.72  
292: 3026.80  
293: 3029.72  
294: 3036.51  
295: 3040.99  
296: 3054.71

297: 3057.72  
298: 3062.08  
299: 3065.52  
300: 3070.38  
301: 3072.12  
302: 3075.81  
303: 3075.94  
304: 3082.54  
305: 3084.51  
306: 3090.82  
307: 3093.96  
308: 3106.20  
309: 3107.03  
310: 3110.09  
311: 3113.78  
312: 3115.39  
313: 3117.17  
314: 3117.90  
315: 3118.11  
316: 3119.26  
317: 3122.49  
318: 3139.21  
319: 3140.22  
320: 3145.44  
321: 3148.67  
322: 3153.31  
323: 3157.63  
324: 3187.07  
325: 3206.91  
326: 3213.20  
327: 3216.21  
328: 3245.50  
329: 3247.67  
330: 3264.11  
331: 3278.41  
332: 3654.37

#### Nitrito Complex

0: 0.00  
1: 0.00  
2: 0.00  
3: 0.00  
4: 0.00  
5: 0.00  
6: -86.85  
7: -67.69  
8: -43.90  
9: -34.25

10: -13.69  
11: -5.12  
12: 13.90  
13: 14.87  
14: 18.41  
15: 20.53  
16: 24.75  
17: 27.39  
18: 29.61  
19: 35.19  
20: 37.41  
21: 40.65  
22: 45.43  
23: 47.27  
24: 51.67  
25: 55.03  
26: 57.86  
27: 63.98  
28: 66.46  
29: 68.92  
30: 69.68  
31: 74.20  
32: 76.32  
33: 81.69  
34: 87.81  
35: 92.79  
36: 98.78  
37: 102.35  
38: 107.13  
39: 110.49  
40: 112.73  
41: 117.16  
42: 121.87  
43: 124.39  
44: 128.09  
45: 131.24  
46: 136.56  
47: 148.16  
48: 158.11  
49: 161.33  
50: 171.13  
51: 174.79  
52: 178.08  
53: 187.75  
54: 191.56  
55: 195.85  
56: 197.46

57: 203.53  
58: 204.82  
59: 206.67  
60: 216.52  
61: 219.64  
62: 226.23  
63: 234.09  
64: 244.84  
65: 246.32  
66: 249.05  
67: 252.46  
68: 261.86  
69: 268.80  
70: 274.56  
71: 279.99  
72: 285.87  
73: 288.30  
74: 294.74  
75: 300.41  
76: 304.83  
77: 315.09  
78: 329.14  
79: 333.47  
80: 336.09  
81: 343.78  
82: 349.62  
83: 352.49  
84: 359.29  
85: 373.37  
86: 375.52  
87: 376.92  
88: 380.53  
89: 407.10  
90: 414.99  
91: 433.32  
92: 436.05  
93: 450.99  
94: 474.72  
95: 480.07  
96: 490.02  
97: 508.91  
98: 515.24  
99: 524.69  
100: 534.58  
101: 541.51  
102: 560.87  
103: 567.77

104: 575.82  
105: 587.94  
106: 614.31  
107: 635.73  
108: 642.79  
109: 643.57  
110: 644.51  
111: 658.83  
112: 668.30  
113: 674.23  
114: 677.09  
115: 678.61  
116: 686.04  
117: 695.47  
118: 715.05  
119: 718.73  
120: 725.39  
121: 726.87  
122: 729.32  
123: 731.59  
124: 739.83  
125: 743.17  
126: 749.36  
127: 754.22  
128: 758.50  
129: 771.53  
130: 775.37  
131: 782.17  
132: 783.58  
133: 795.27  
134: 802.04  
135: 813.26  
136: 818.26  
137: 843.04  
138: 845.33  
139: 846.11  
140: 847.60  
141: 848.06  
142: 848.44  
143: 854.14  
144: 868.32  
145: 874.24  
146: 875.35  
147: 888.71  
148: 903.27  
149: 924.51  
150: 936.81

151: 946.95  
152: 950.82  
153: 952.13  
154: 960.29  
155: 961.83  
156: 967.70  
157: 975.76  
158: 983.04  
159: 991.16  
160: 1007.05  
161: 1008.28  
162: 1015.17  
163: 1018.03  
164: 1024.33  
165: 1026.63  
166: 1027.99  
167: 1029.90  
168: 1032.54  
169: 1035.16  
170: 1040.29  
171: 1042.25  
172: 1048.73  
173: 1053.27  
174: 1067.18  
175: 1075.79  
176: 1079.61  
177: 1090.28  
178: 1093.47  
179: 1099.53  
180: 1104.12  
181: 1112.17  
182: 1118.36  
183: 1138.29  
184: 1142.09  
185: 1151.17  
186: 1154.36  
187: 1155.68  
188: 1156.91  
189: 1161.76  
190: 1162.72  
191: 1169.34  
192: 1184.17  
193: 1200.85  
194: 1215.74  
195: 1216.71  
196: 1226.05  
197: 1233.88



198: 1244.59  
199: 1247.13  
200: 1248.81  
201: 1266.36  
202: 1271.00  
203: 1274.60  
204: 1286.50  
205: 1295.29  
206: 1296.30  
207: 1305.04  
208: 1305.74  
209: 1312.33  
210: 1313.61  
211: 1320.83  
212: 1323.80  
213: 1332.87  
214: 1333.70  
215: 1336.28  
216: 1344.66  
217: 1350.08  
218: 1366.49  
219: 1367.98  
220: 1369.10  
221: 1377.89  
222: 1379.66  
223: 1384.90  
224: 1389.74  
225: 1395.34  
226: 1398.03  
227: 1400.94  
228: 1403.29  
229: 1410.56  
230: 1413.63  
231: 1417.38  
232: 1417.97  
233: 1420.61  
234: 1422.91  
235: 1427.40  
236: 1430.88  
237: 1433.87  
238: 1437.08  
239: 1443.95  
240: 1445.91  
241: 1448.06  
242: 1449.33  
243: 1451.72  
244: 1453.66

245: 1456.99  
246: 1459.95  
247: 1460.59  
248: 1462.28  
249: 1462.92  
250: 1463.38  
251: 1467.23  
252: 1467.92  
253: 1469.12  
254: 1470.24  
255: 1471.28  
256: 1473.49  
257: 1483.55  
258: 1483.70  
259: 1491.55  
260: 1515.54  
261: 1524.57  
262: 1529.57  
263: 1531.55  
264: 1534.49  
265: 1540.47  
266: 1563.98  
267: 1578.60  
268: 1592.93  
269: 1607.55  
270: 1616.06  
271: 1620.49  
272: 1623.40  
273: 1638.57  
274: 1646.61  
275: 1657.76  
276: 1678.68  
277: 1683.97  
278: 1712.01  
279: 1731.69  
280: 1760.11  
281: 2989.75  
282: 2998.84  
283: 3001.43  
284: 3001.72  
285: 3006.20  
286: 3007.02  
287: 3007.47  
288: 3011.56  
289: 3014.38  
290: 3017.13  
291: 3021.48

292: 3025.57  
293: 3030.50  
294: 3036.72  
295: 3049.98  
296: 3057.68  
297: 3060.28  
298: 3063.89  
299: 3067.91  
300: 3071.19  
301: 3071.28  
302: 3072.35  
303: 3074.04  
304: 3077.73  
305: 3077.89  
306: 3079.20  
307: 3097.43  
308: 3106.51  
309: 3109.44  
310: 3116.67  
311: 3117.43  
312: 3118.88  
313: 3124.17  
314: 3124.19  
315: 3132.63  
316: 3135.30  
317: 3137.73  
318: 3144.81  
319: 3147.78  
320: 3149.75  
321: 3150.46  
322: 3153.03  
323: 3163.76  
324: 3170.35  
325: 3207.45  
326: 3208.12  
327: 3223.36  
328: 3229.30  
329: 3243.44  
330: 3265.18  
331: 3276.65  
332: 3649.25

The first 6 frequencies correspond to translational and rotational ones and so are  $0.00 \text{ cm}^{-1}$

The imaginary frequencies are a result of the fragment optimization methodology and are associated with the atoms whose coordinates are kept constrained.
